# Supplementary material for: Phytochemical Characterization and In Vitro Antioxidant Properties of Four Brassica Wild Species from Italy
Source: MDPI journal article supplement (doi:10.3390/molecules25153495), 2020-07-31
Supplement: s1 [file s1]

# Supplementary Materials: Phytochemical Characterization and In Vitro Antioxidant Properties of Four *Brassica* Wild Species from Italy

Valentina Picchi <sup>1,\*</sup>, Roberto Lo Scalzo <sup>1</sup>, Aldo Tava <sup>2</sup>, Filippo Doria <sup>3</sup>, Sergio Argento <sup>4</sup>, Stefania Toscano <sup>5</sup>, Simone Treccarichi <sup>5</sup> and Ferdinando Branca <sup>5</sup>

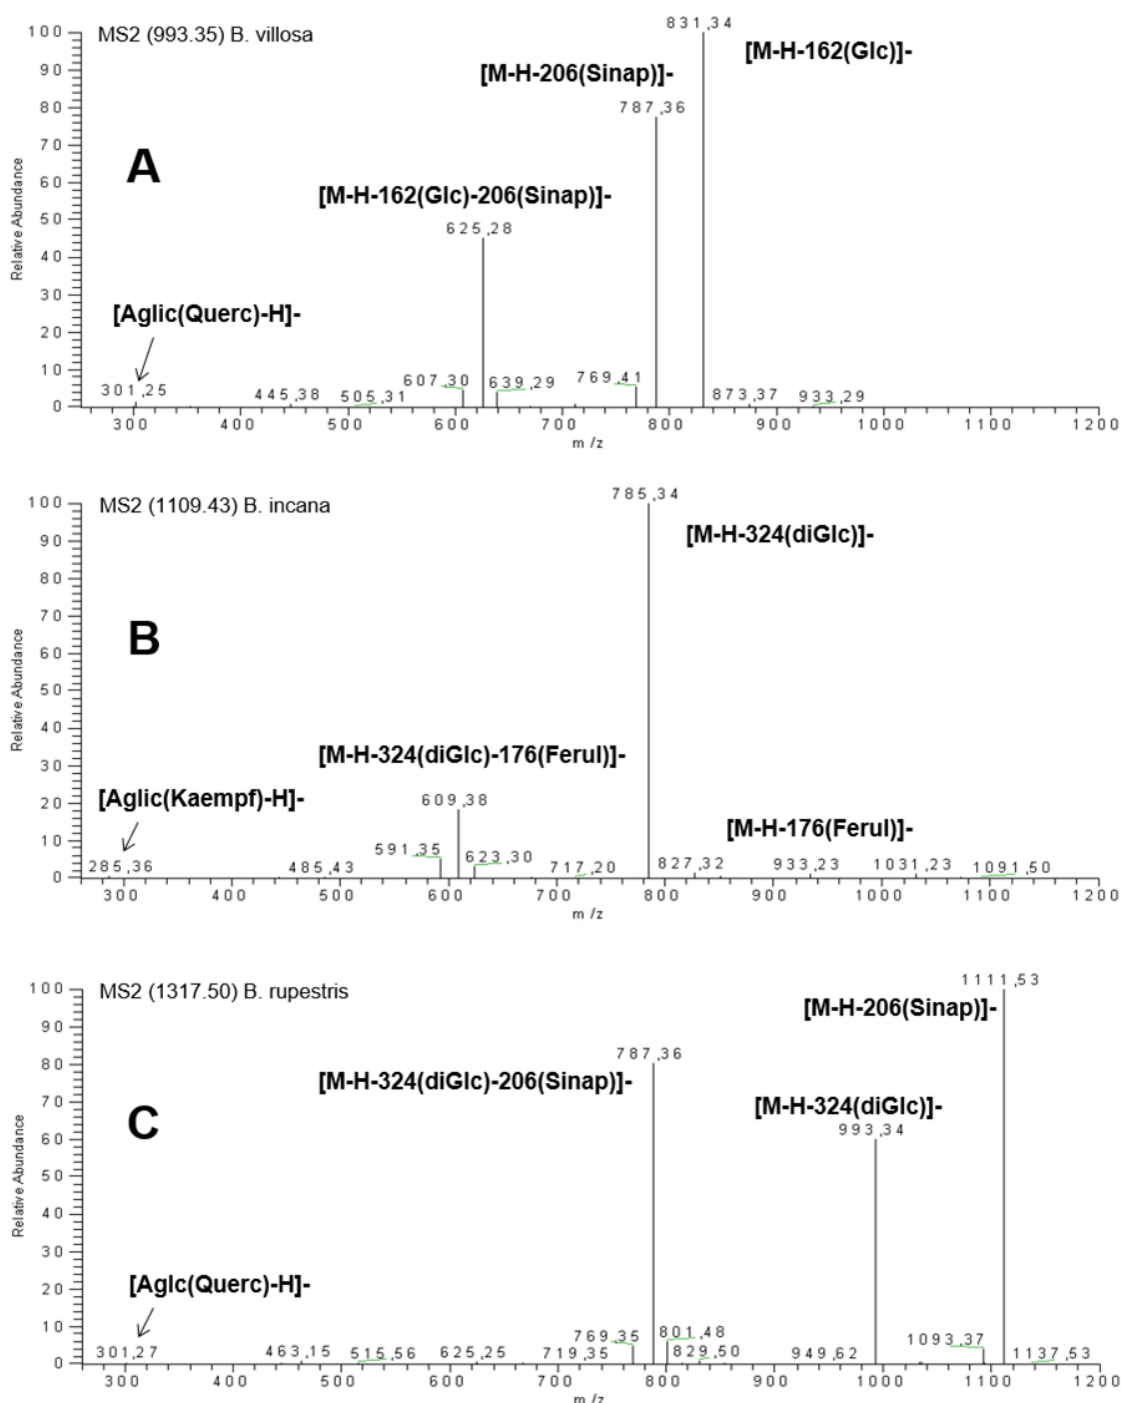

**Figure S1.** Negative ion electrospray MS<sup>2</sup> mass spectra of hydroxycinnamic acid esters of flavonol glycosides: **A)** quercetin 3-*O*-sinapoyldiglucoside-7-*O*-glucoside (**6**); **B)** kaempferol 3-*O*-feruloyldiglucoside-7-*O*-diglucoside (**16**); **C)** quercetin 3-*O*-sinapoyltriglucoside-7-*O*-diglucoside (**8**).

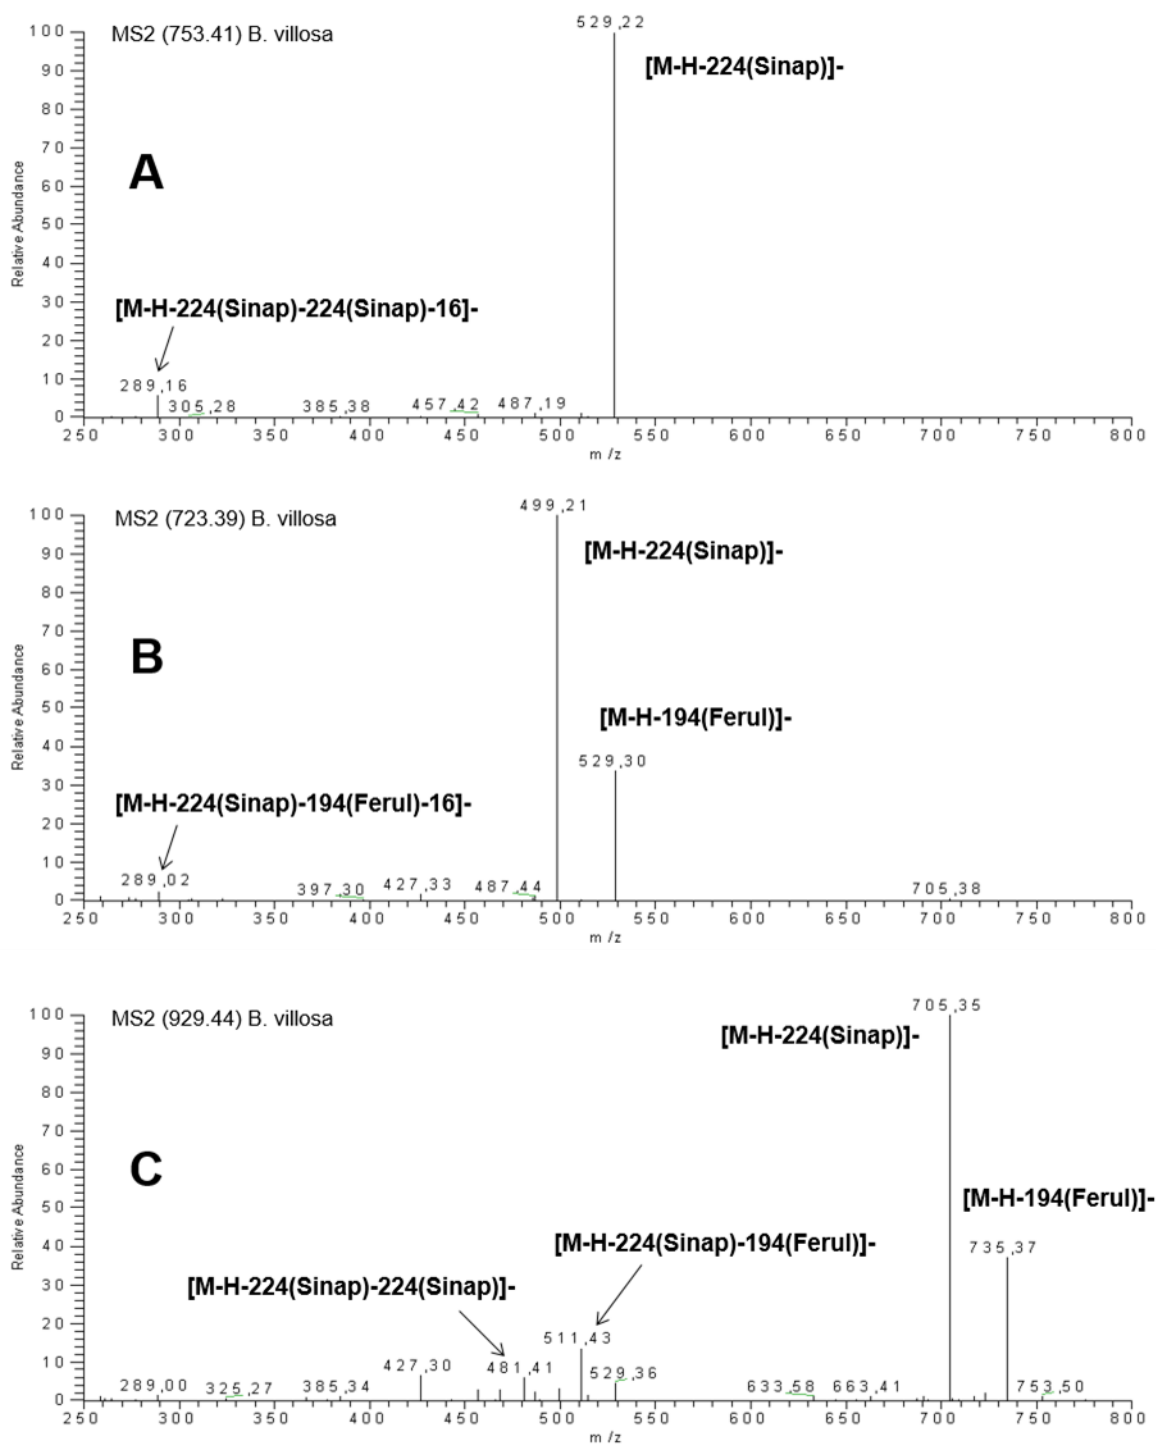

**Figure S2.** Negative ion electrospray MS<sup>2</sup> mass spectra of hydroxycinnamoyl gentiobiosides: **A**) 1,2-disinapoyl gentiobioside (**24**); **B**) 1-sinapoyl-2-feruloyl gentiobioside (**25**); **C**) 1,2-disinapoyl-2-feruloyl gentiobioside (**28**).

BU 15 (*B. rupestris*)

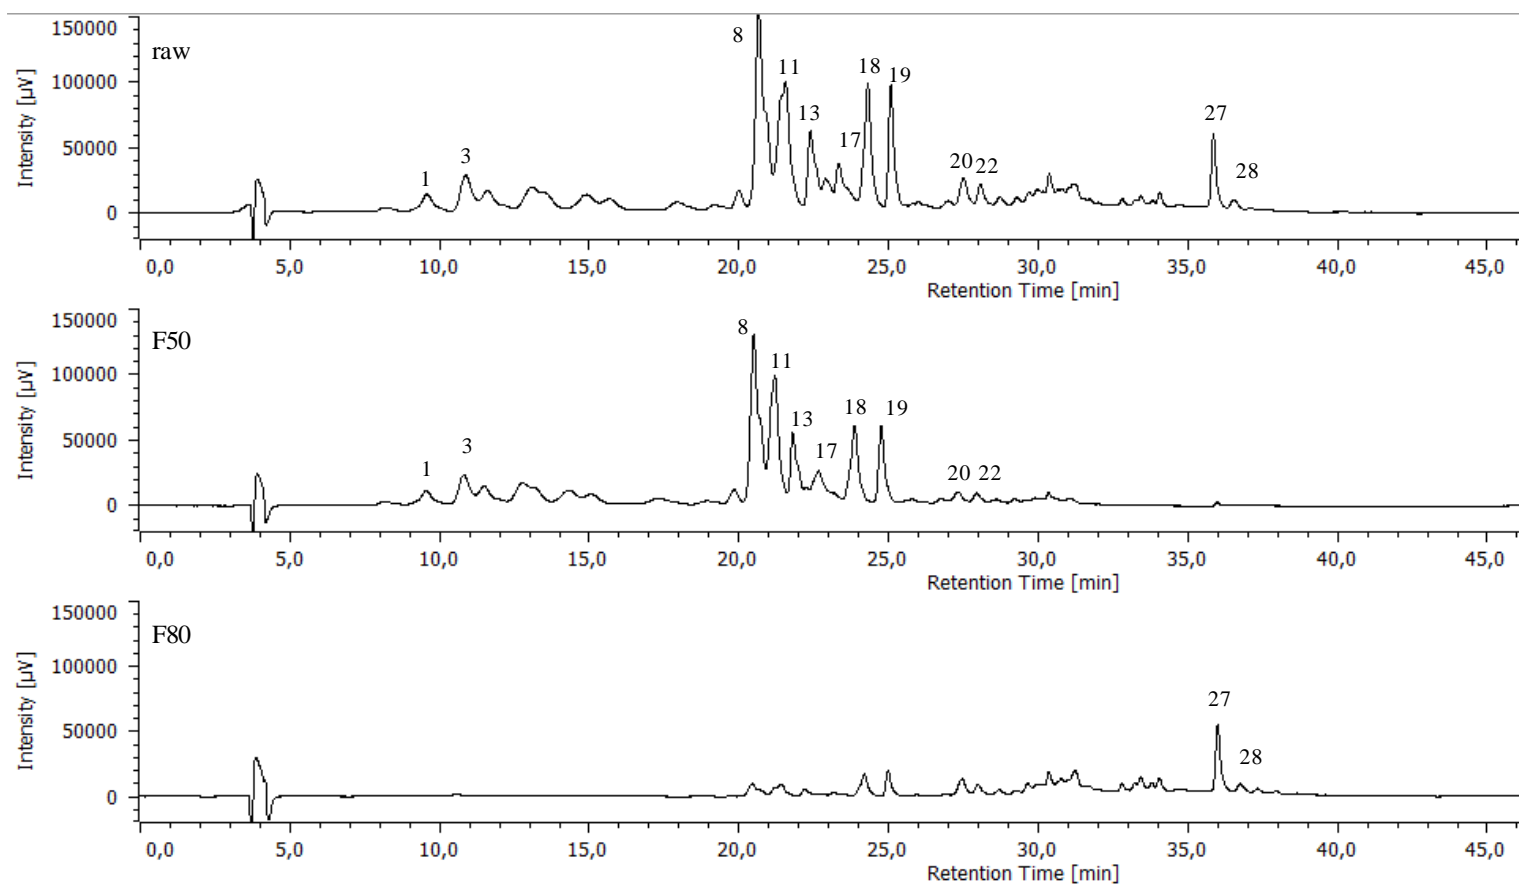

**Figure S3.** Example of chromatograms acquired by HPLC-DAD (330 nm) after solid-phase extraction. See paragraph 2.4 for details. (A) Raw extract; (B) F50, fraction characterized by the predominance of flavonol-caffeoyl derivatives and kaempferol-sinapoyl derivatives; (C) F80, fraction characterized by the predominance of hydroxycinnamoyl gentiobiosides. For peak numbering see Table 1.

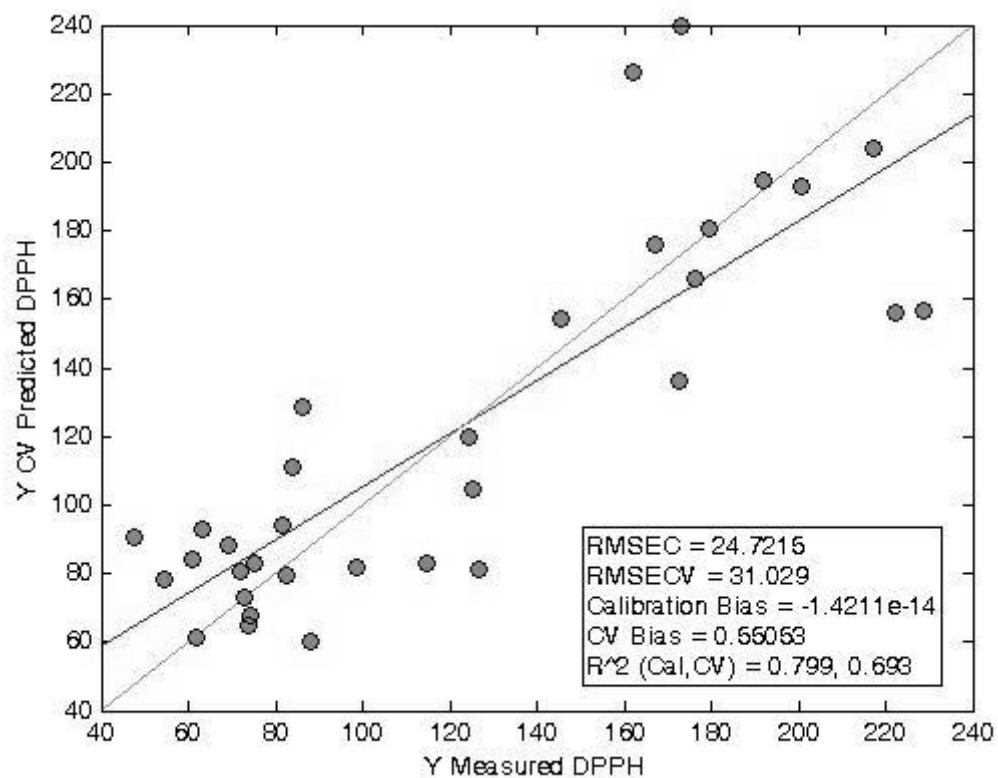

**FigureS4.** Scatter plot measured vs. MLR prediction for DPPH• scavenging activity, with root mean square error (RMSE), bias and coefficient of determination ( $R^2$ ) in calibration (C and Cal) and in cross-validation (CV). See paragraph 2.8. for details.

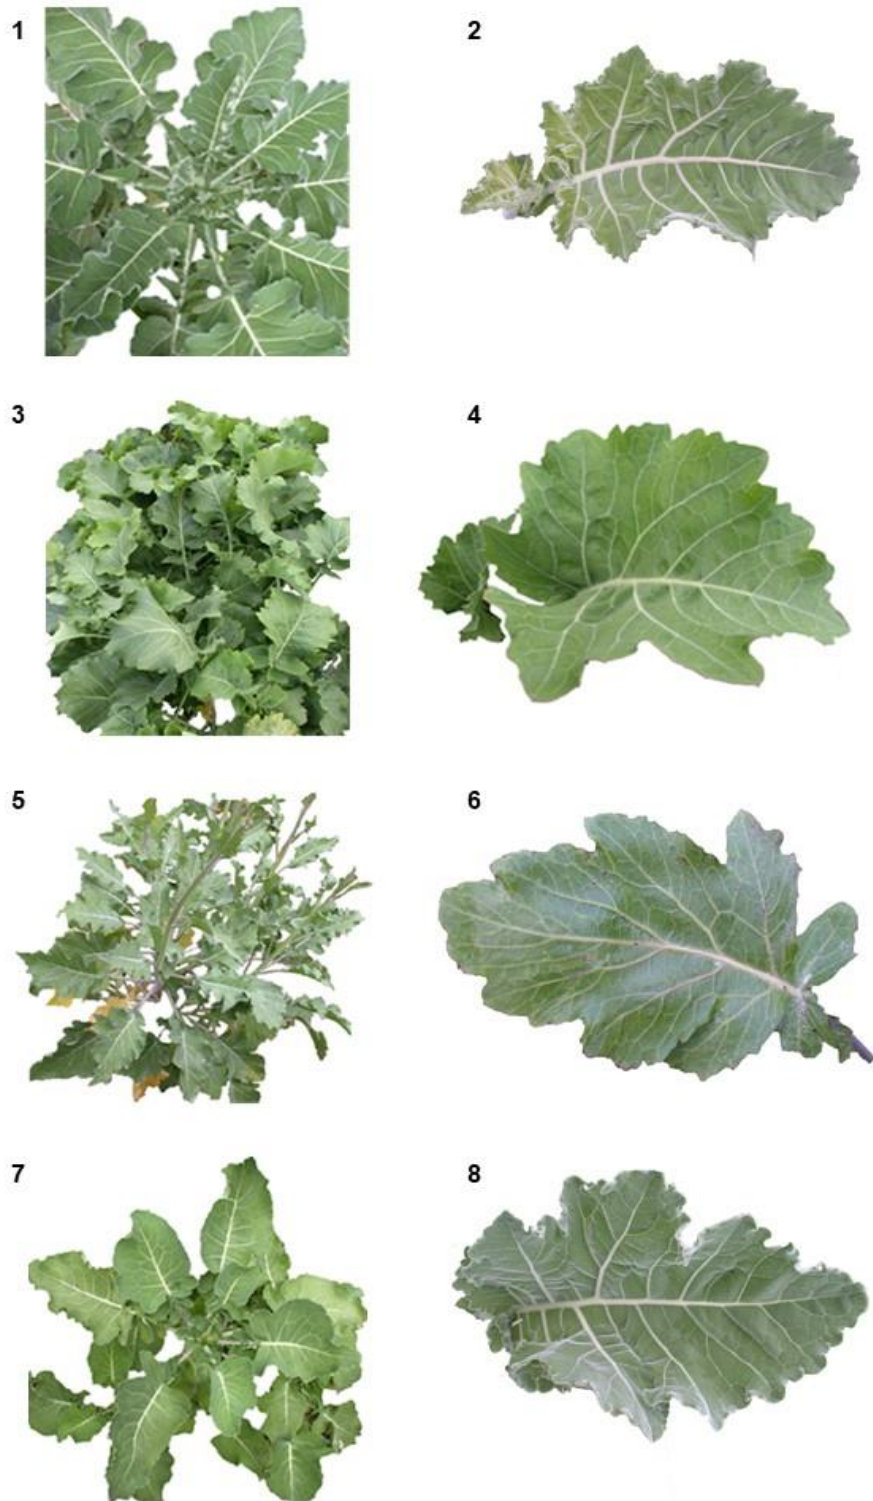

**Figure S5.** Characteristics of the four *Brassica* wild species evaluated in the present work. Whole plant (on the left) and particular of the leaves (on the right) of *B. incana* (1-2), *B. macrocarpa* (3-4), *B. rupestris* (5-6) and *B. villosa* (7-8).
